# Supplementary material for: Aurone-derived 1,2,3-triazoles as potential fluorescence molecules in vitro
Source: Royal Society of Chemistry journal article supplement (doi:10.1039/d2ra02578g), 2022-01-01
Supplement: d2ra02578g1.pdf [file d2ra02578g1.pdf]

**Supplementary figures and information:**

**Figure S1:** NMR spectra for AT2 and AT5

AK\_6831\_chloroform

Solvent: Chloroform-D

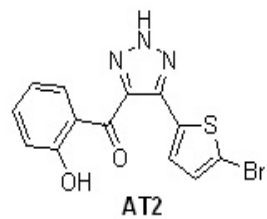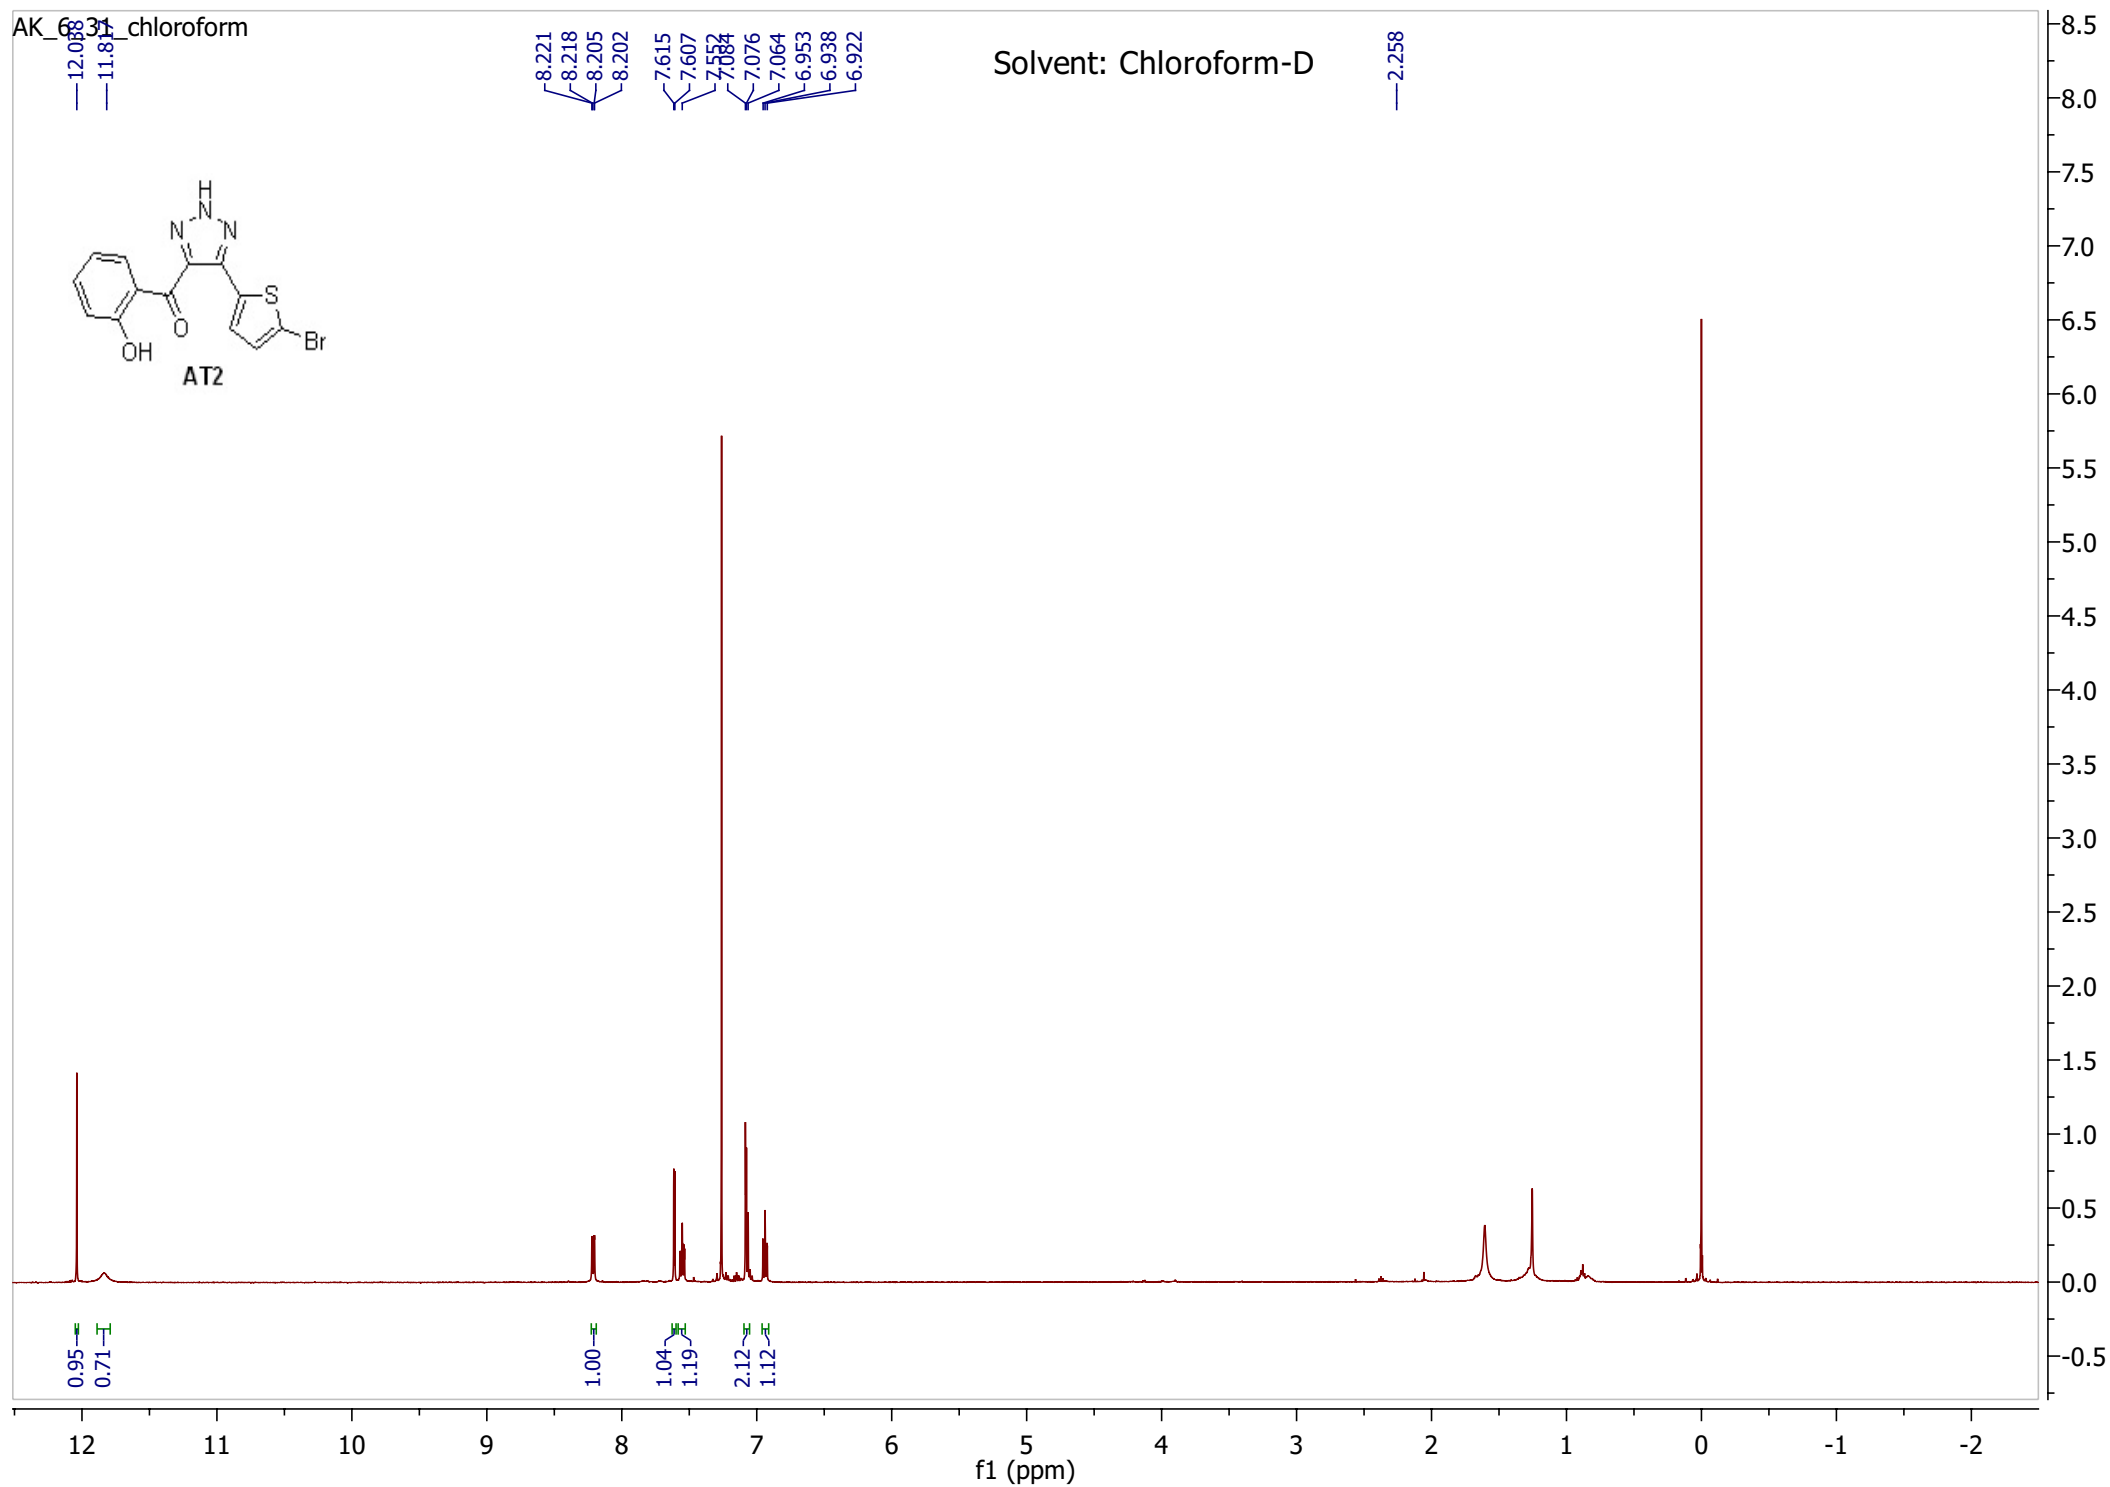

Solvent: Chloroform-D

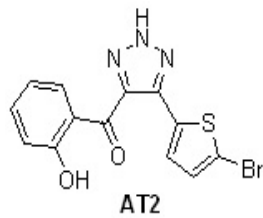

191.294  
163.880  
137.418  
133.704  
130.743  
129.713  
119.488  
119.326  
118.583  
115.865  
110.504  
109.985

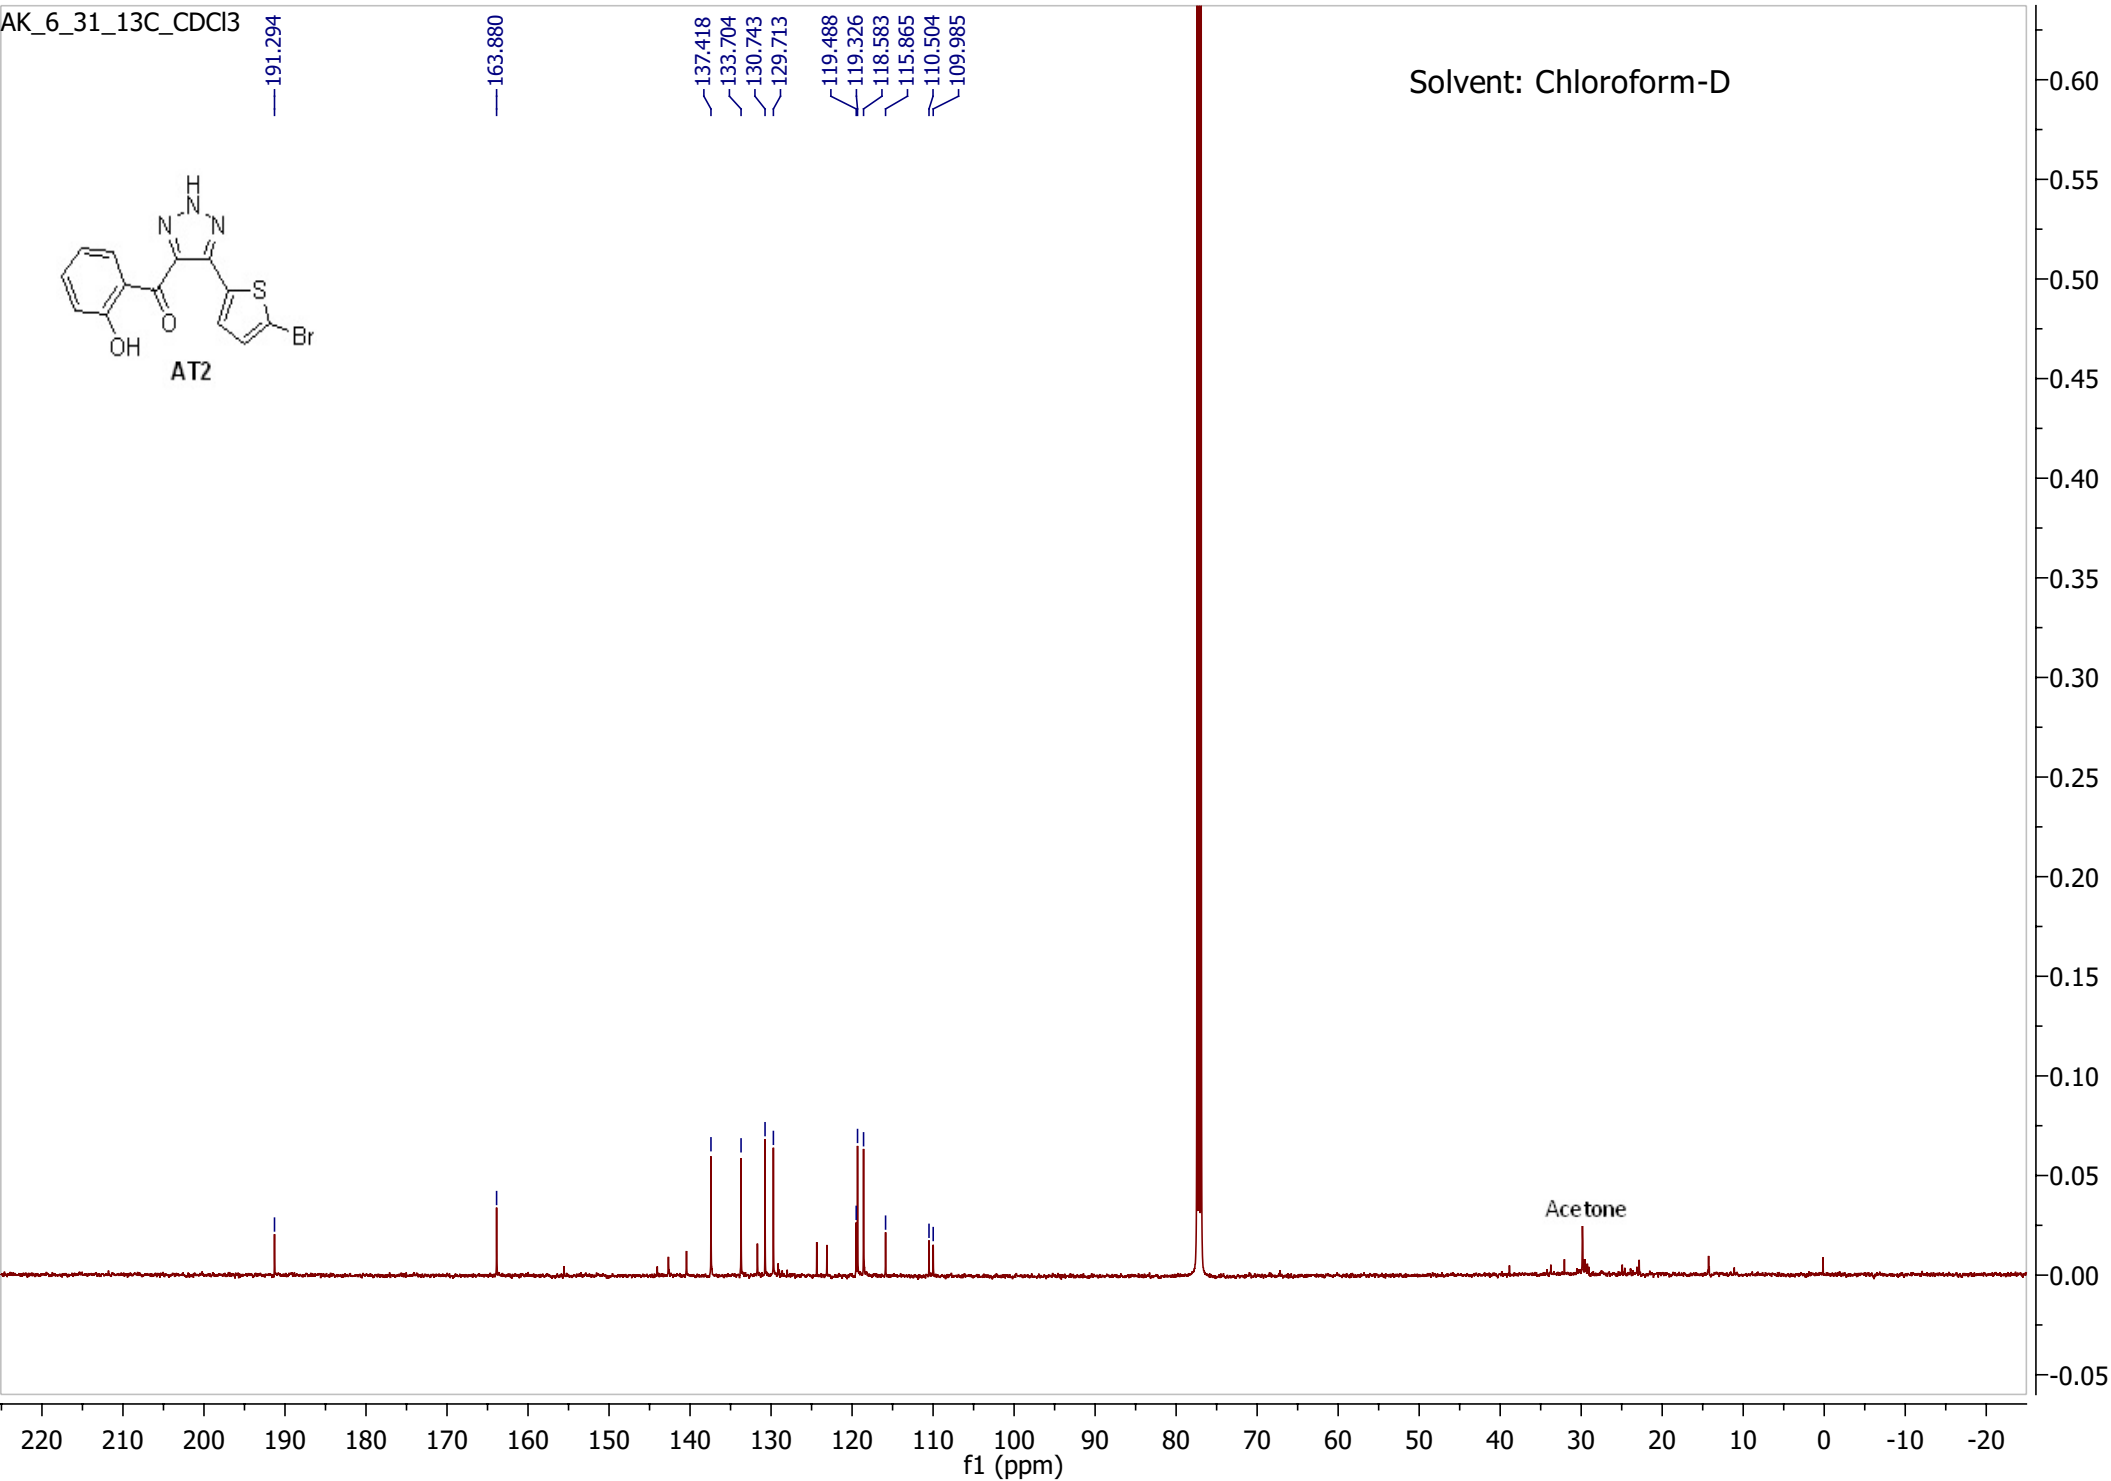

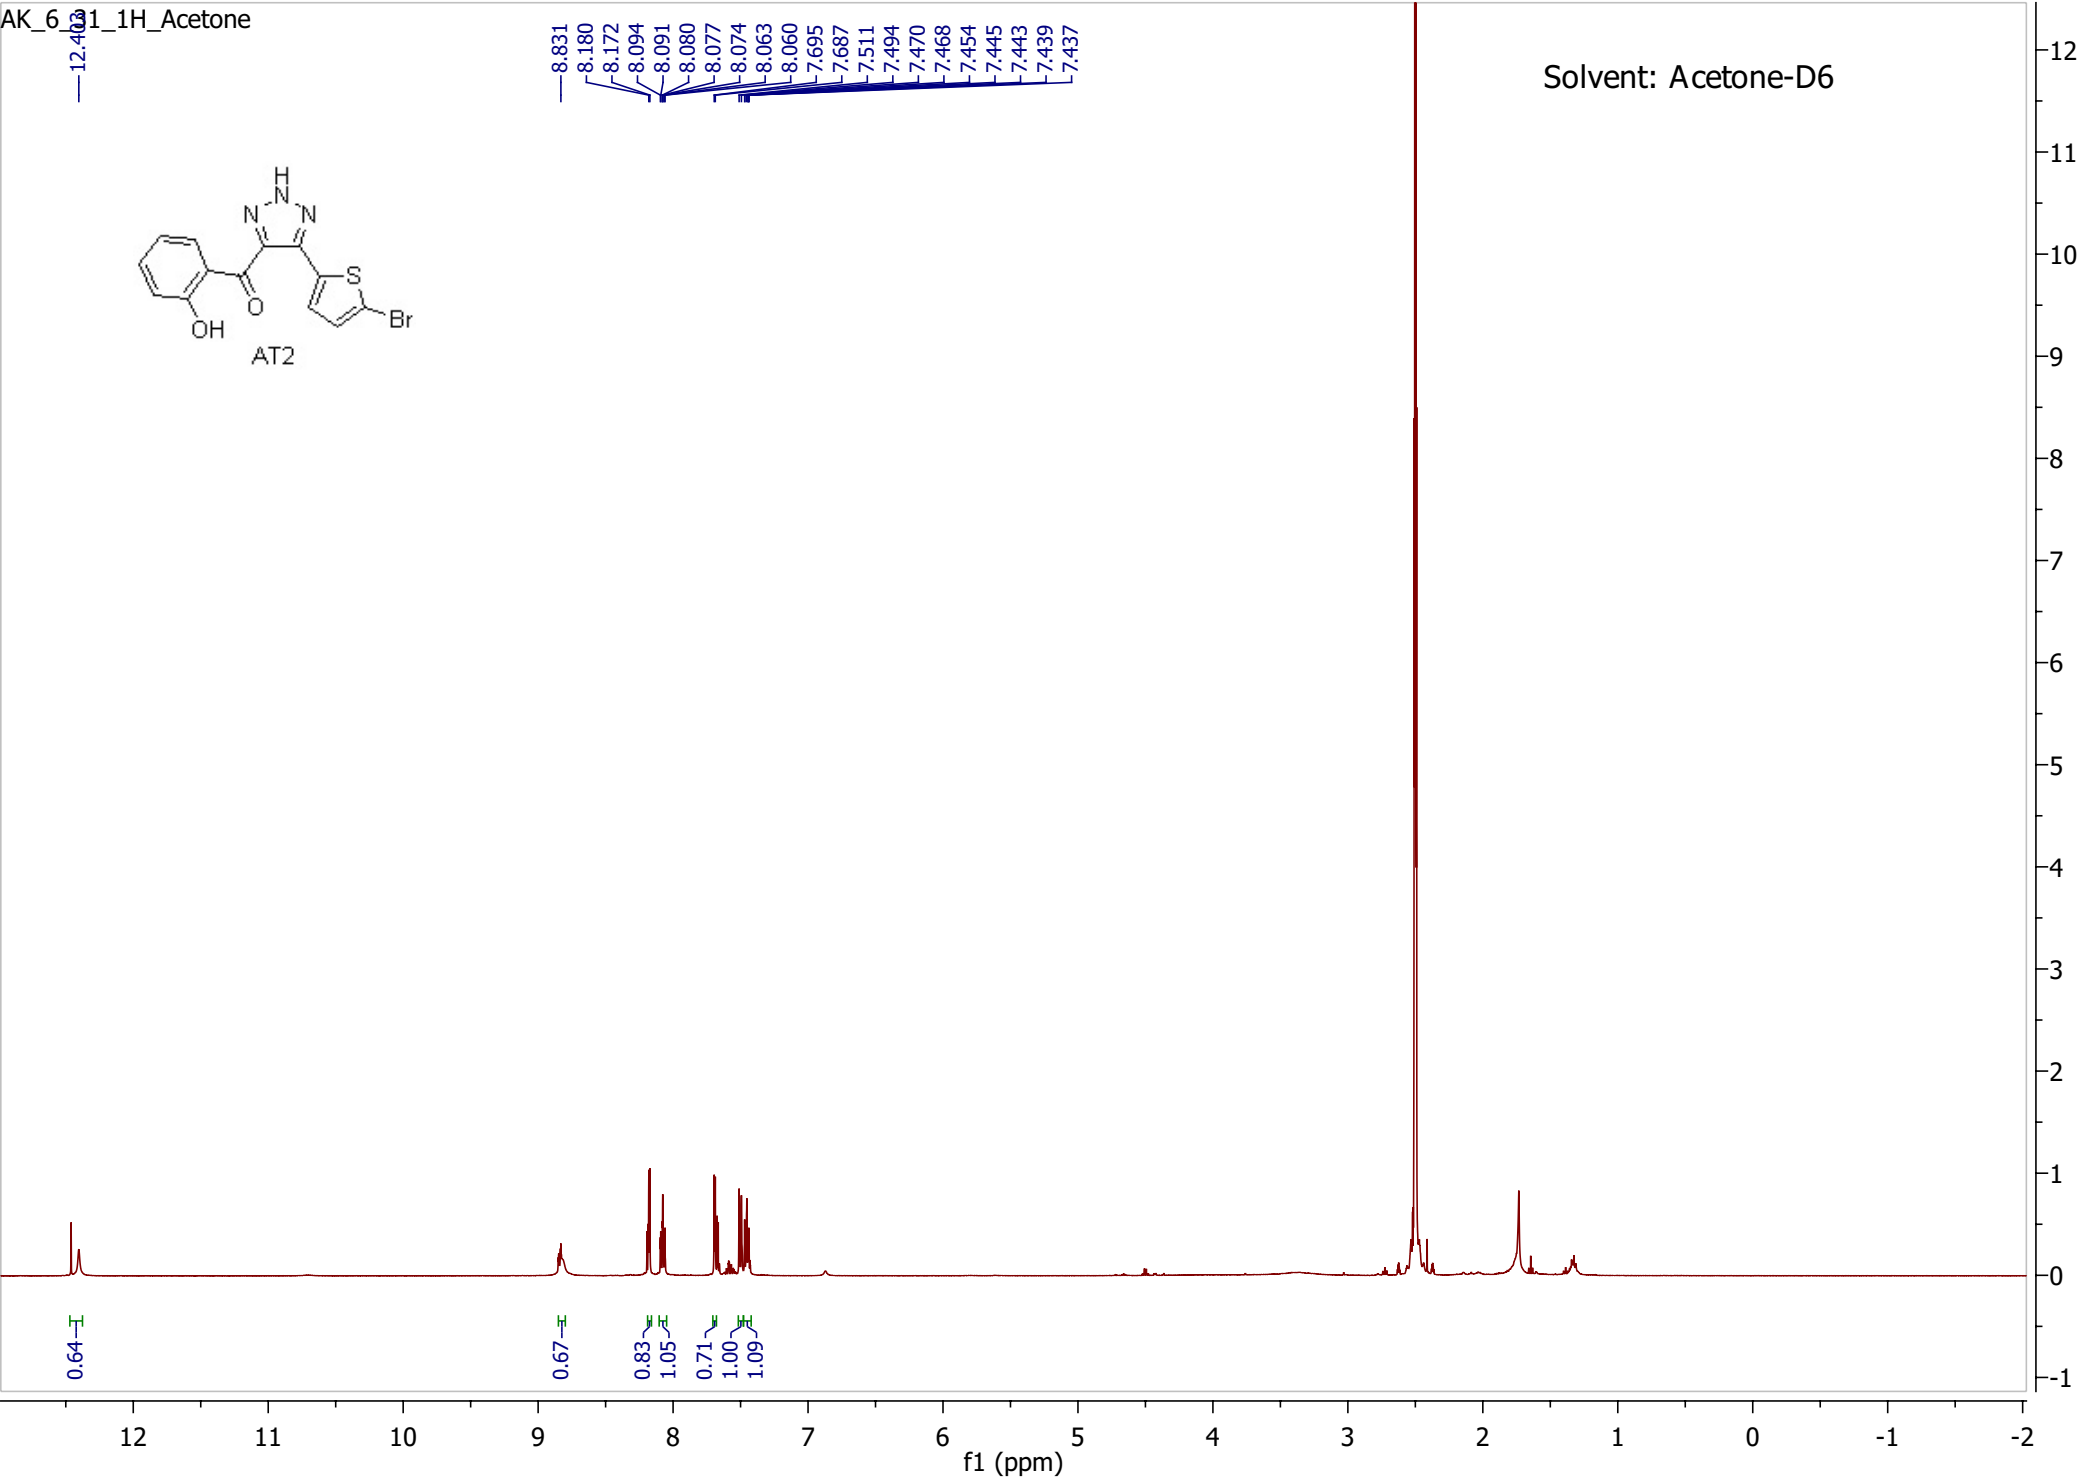

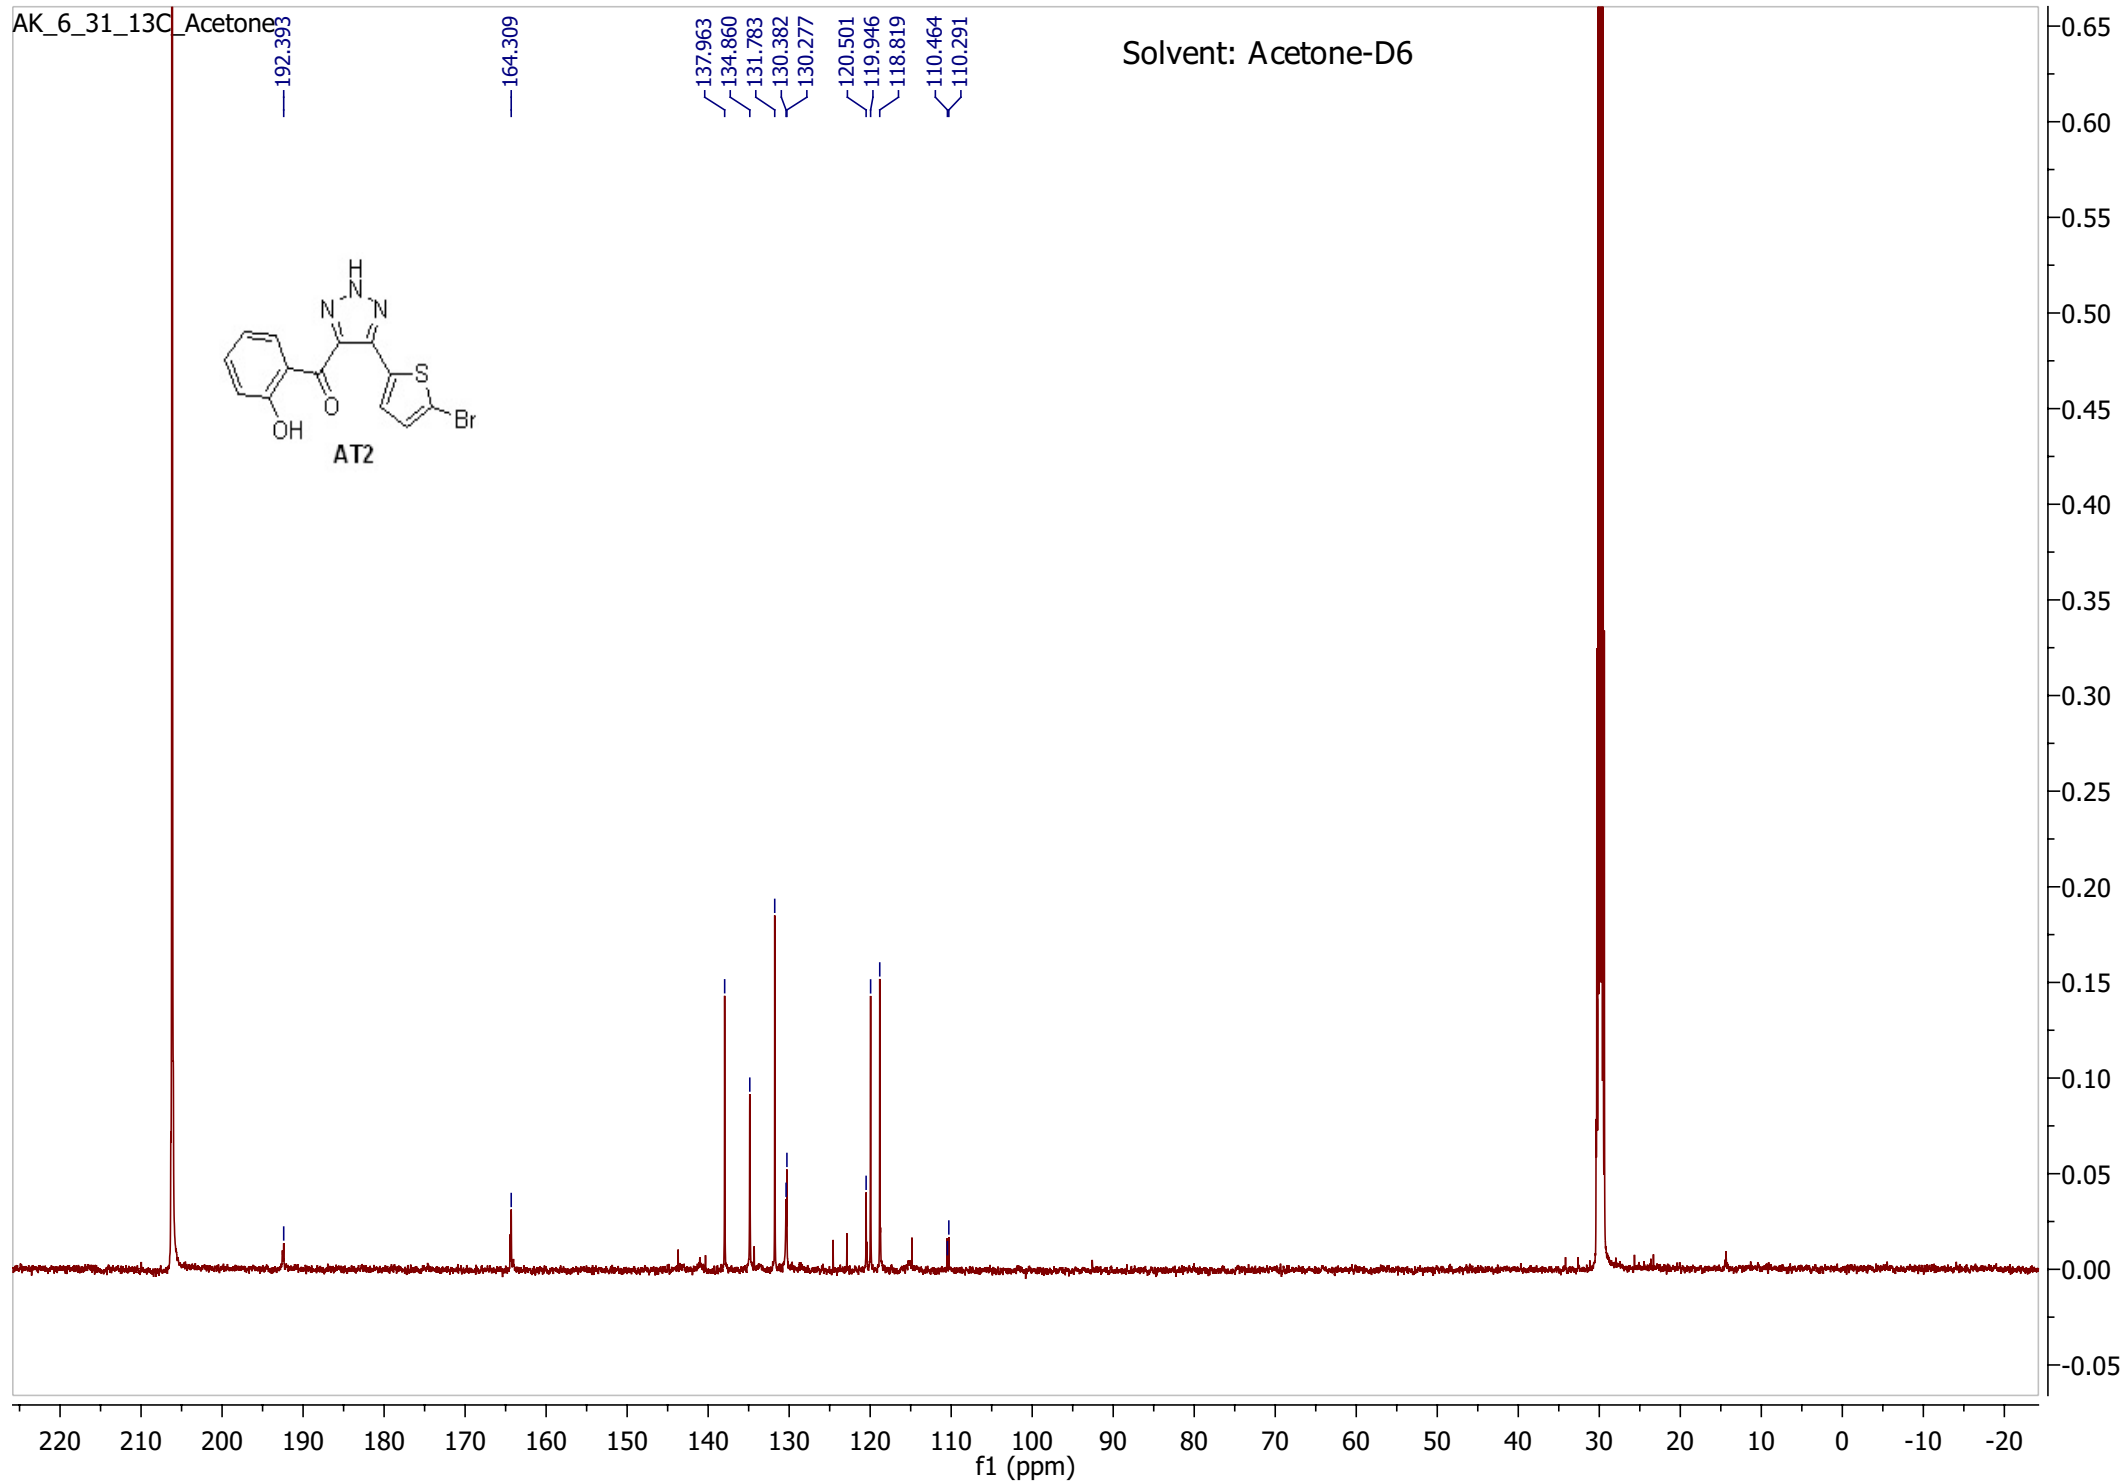

AK\_6\_31\_1H\_DMSO

AK\_6\_31\_1H\_Acetone

AK\_6\_31\_chloroform

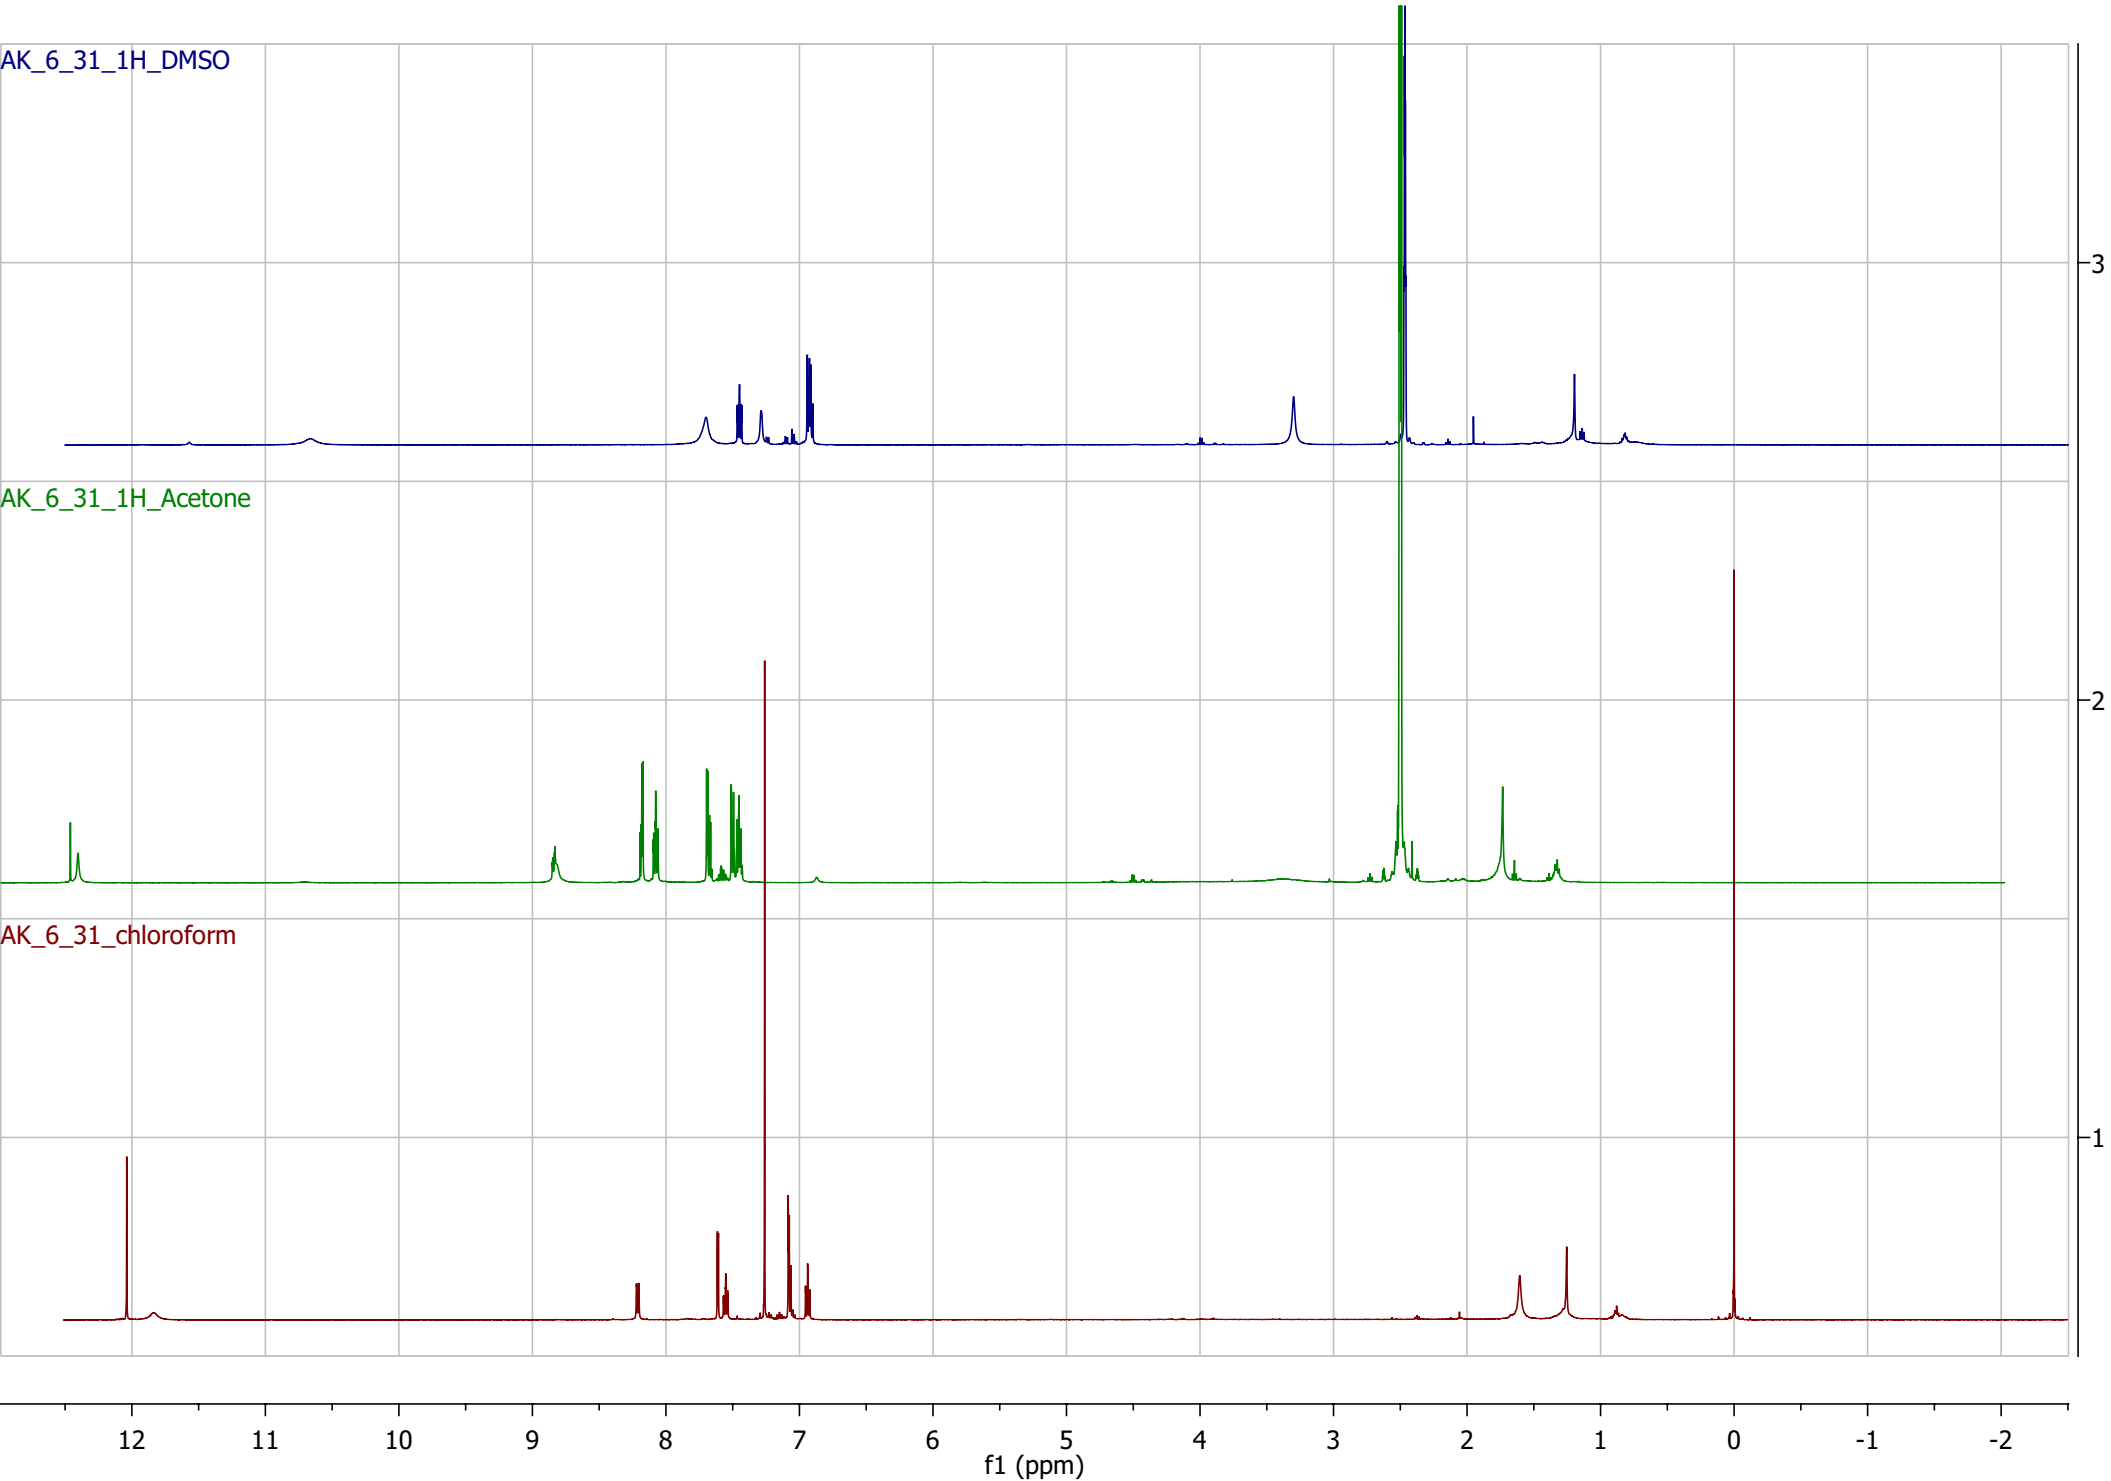

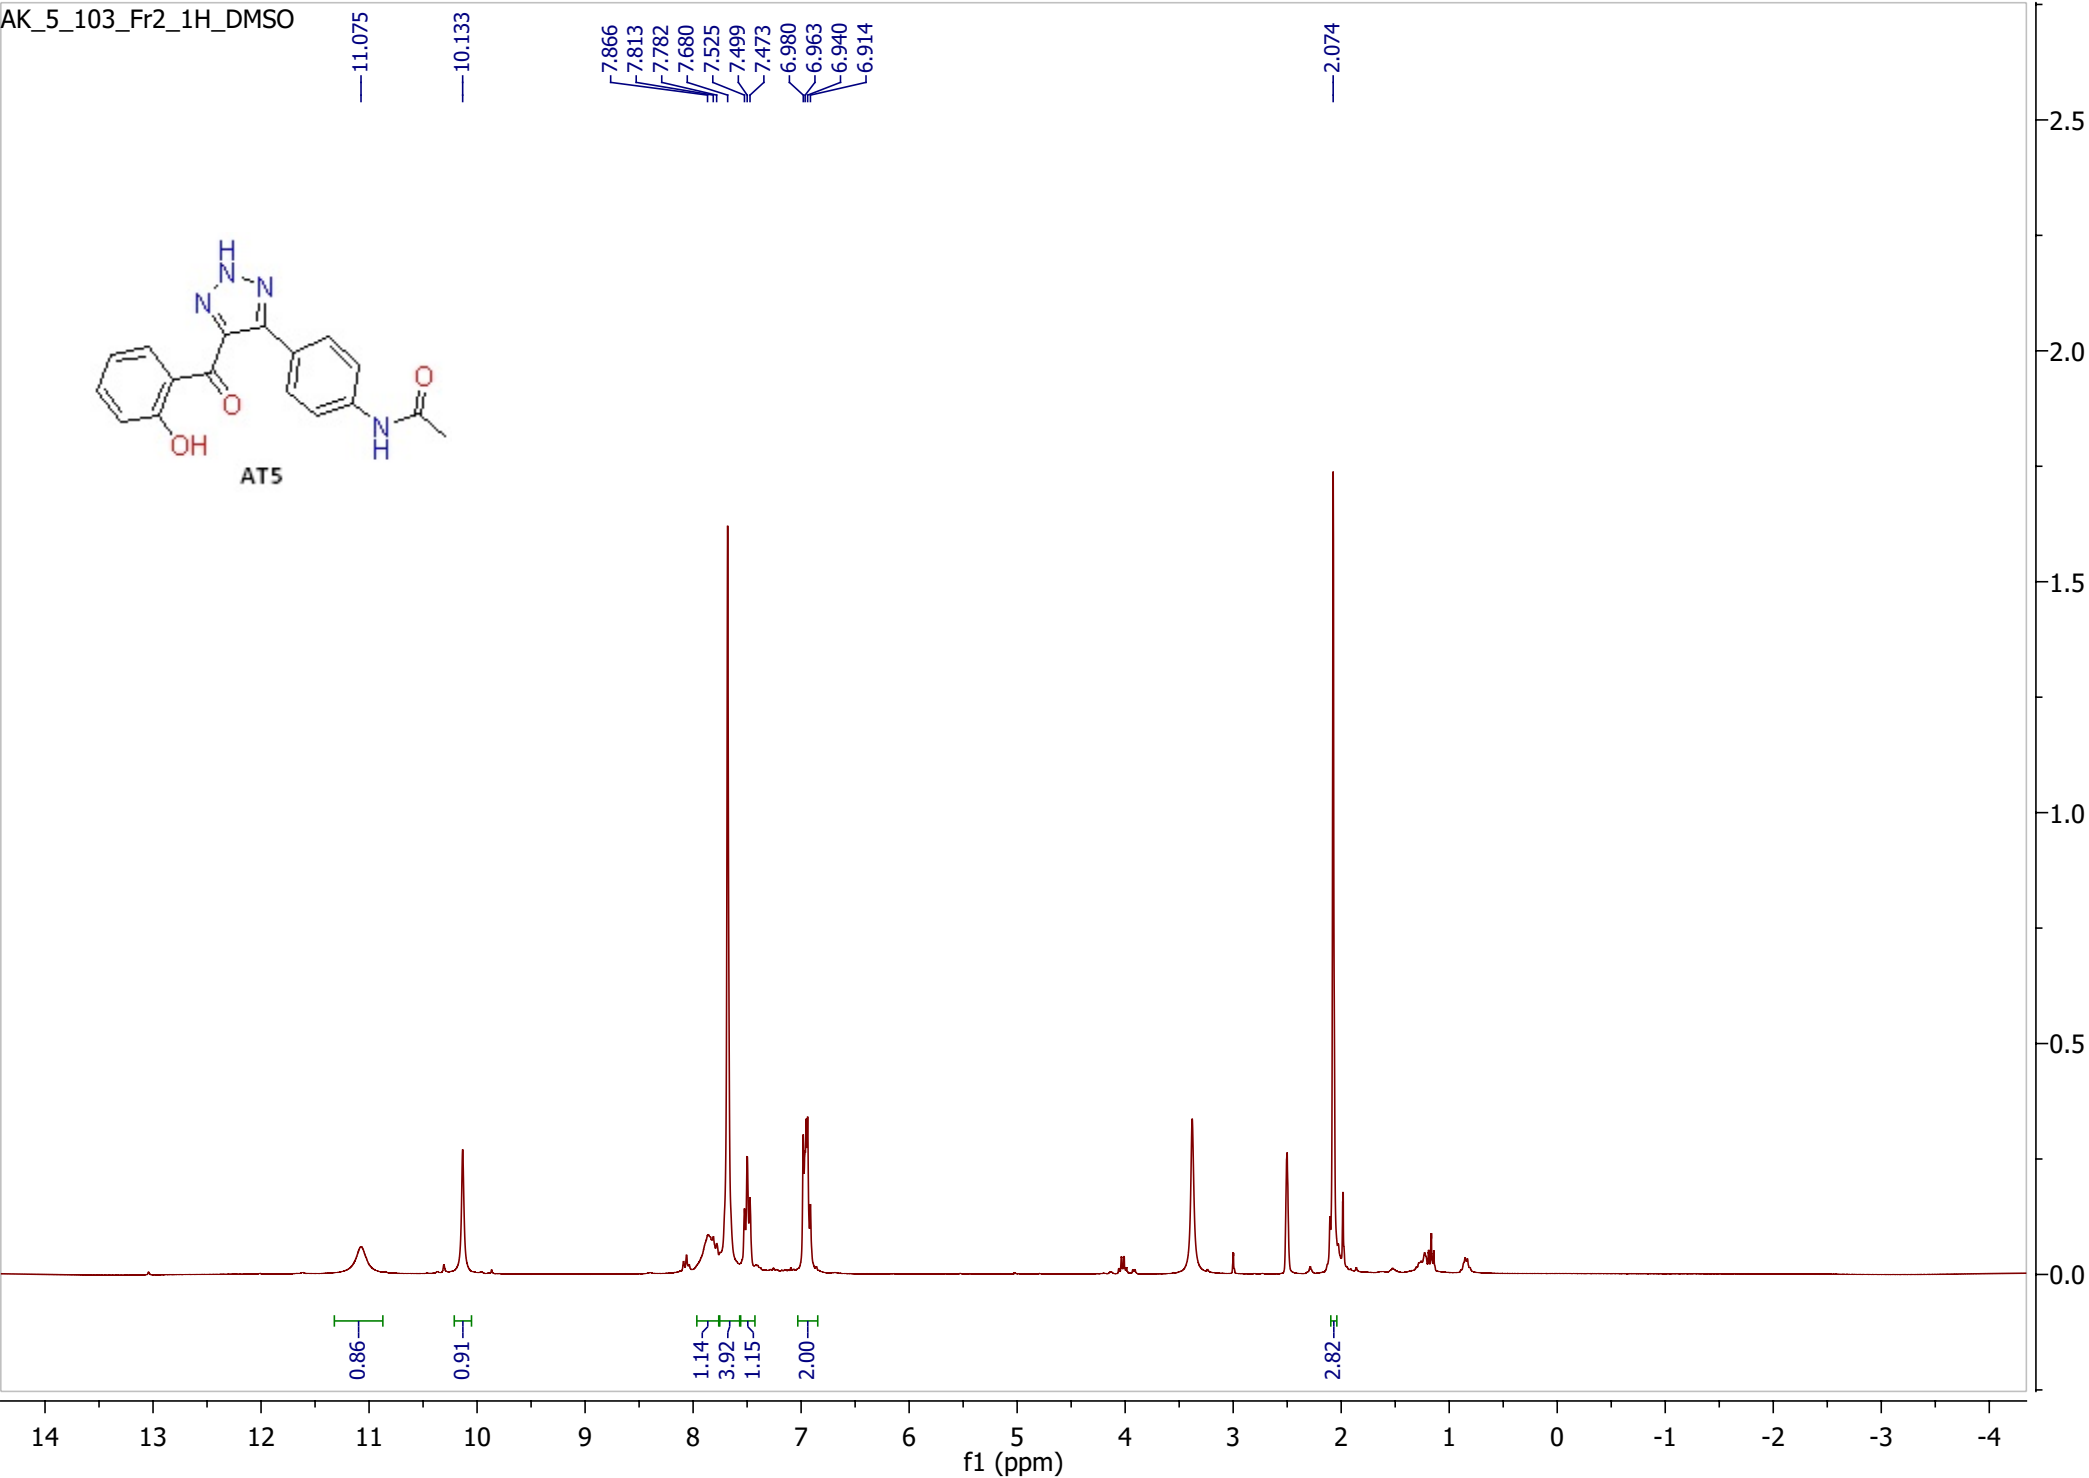

AK\_5\_103\_Fr2\_13C\_DMSO

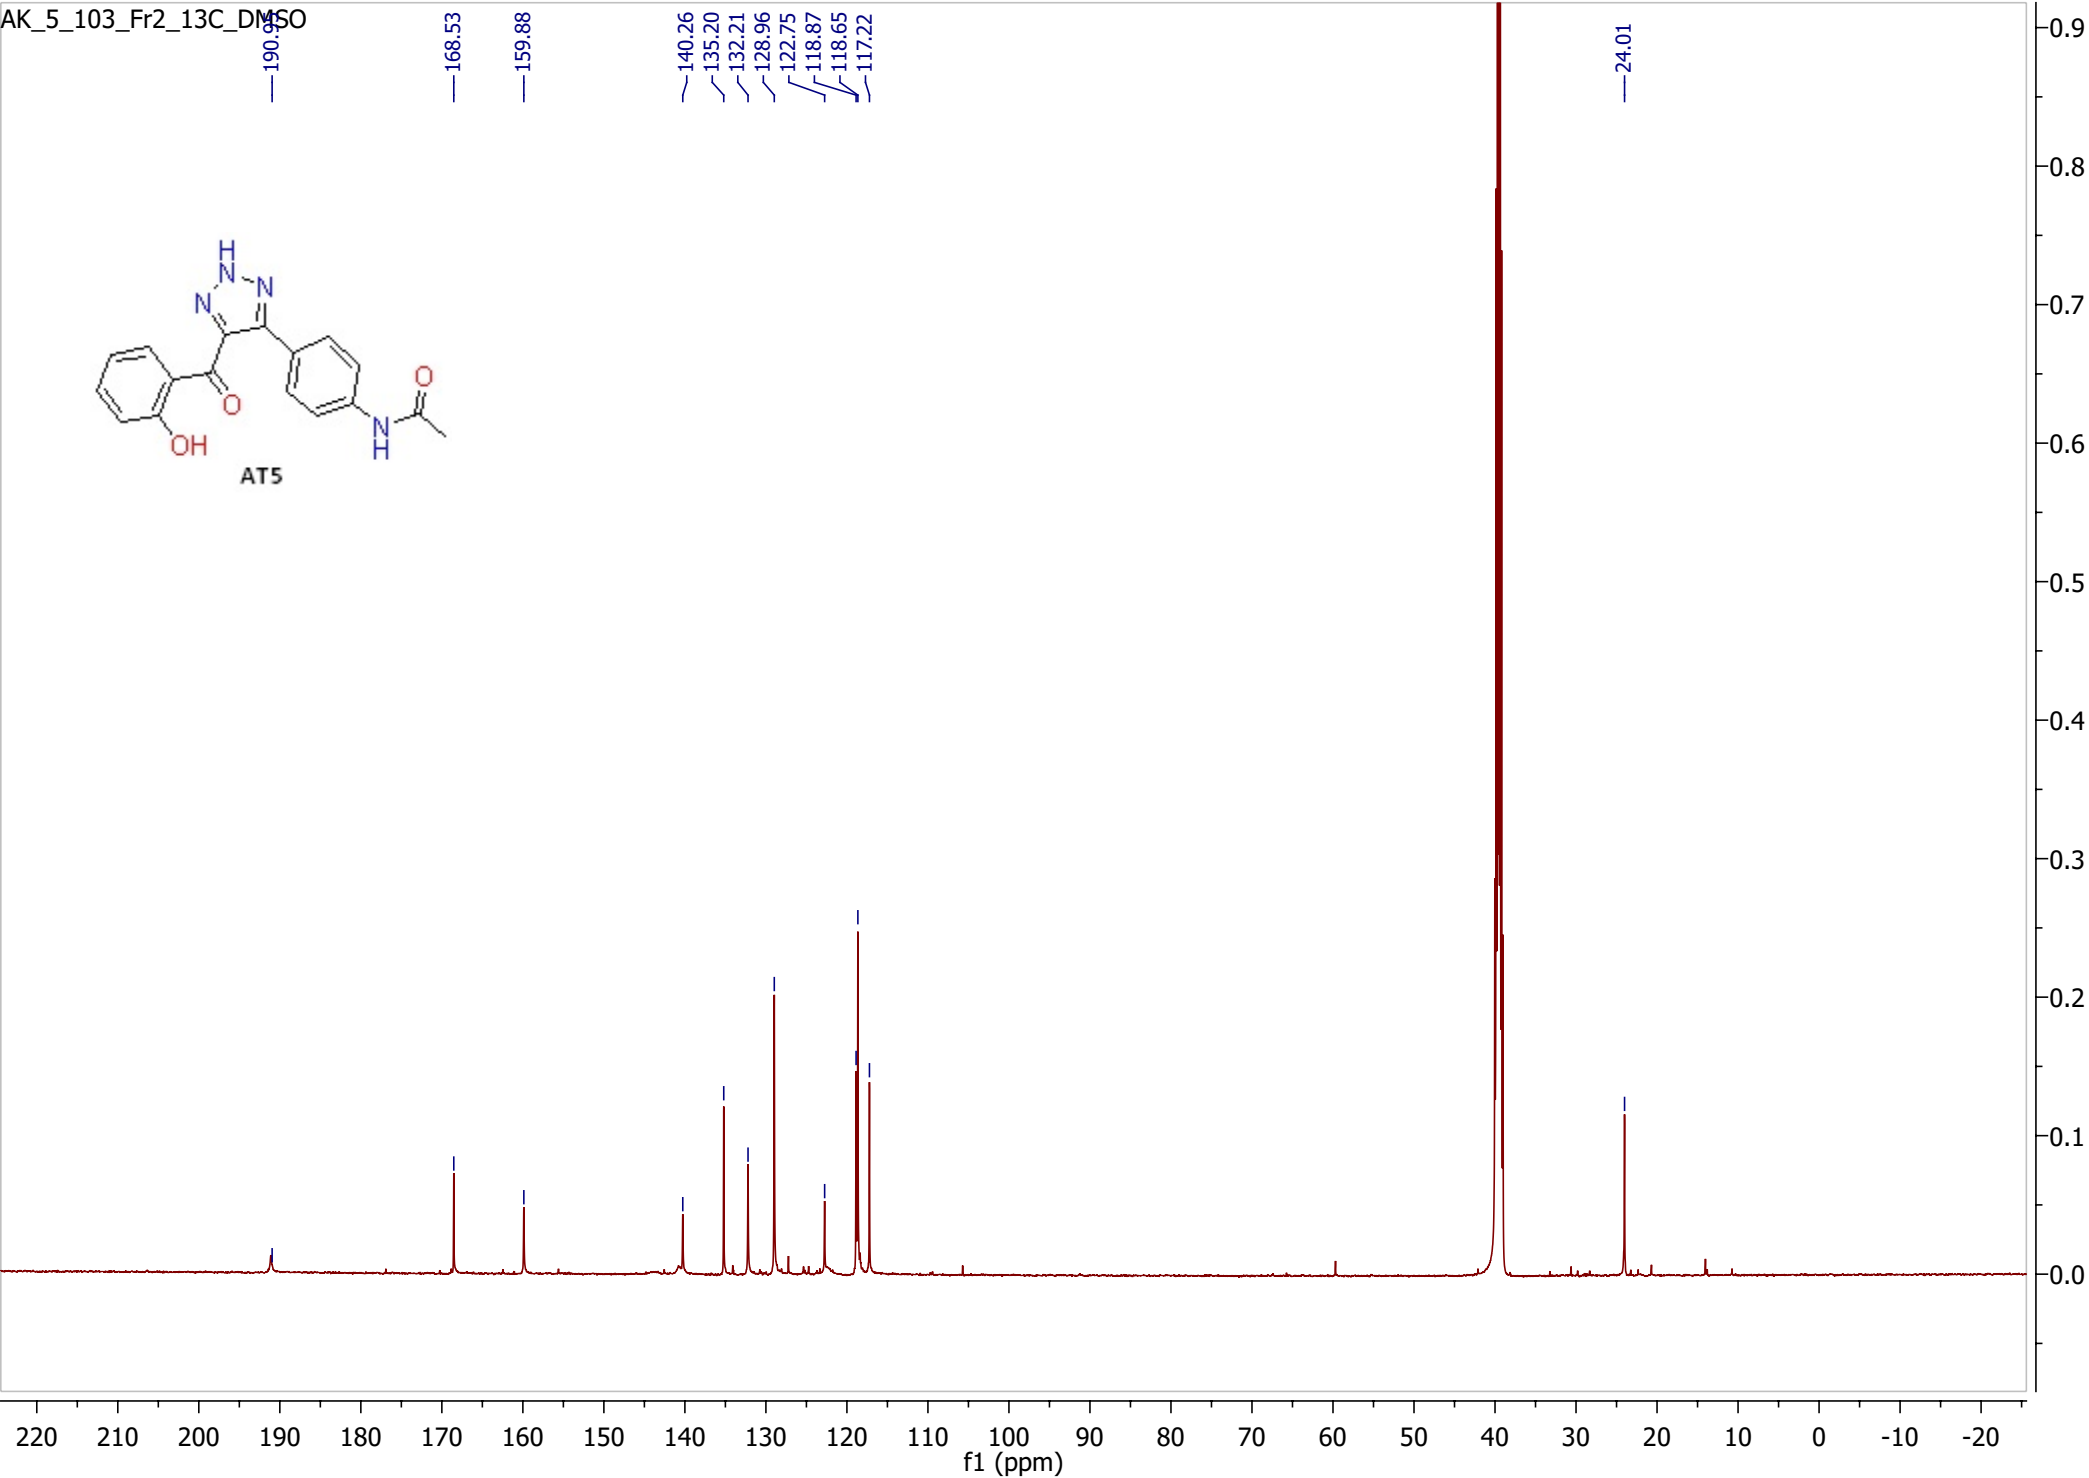

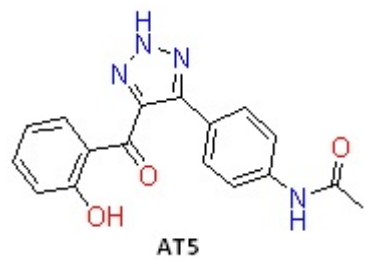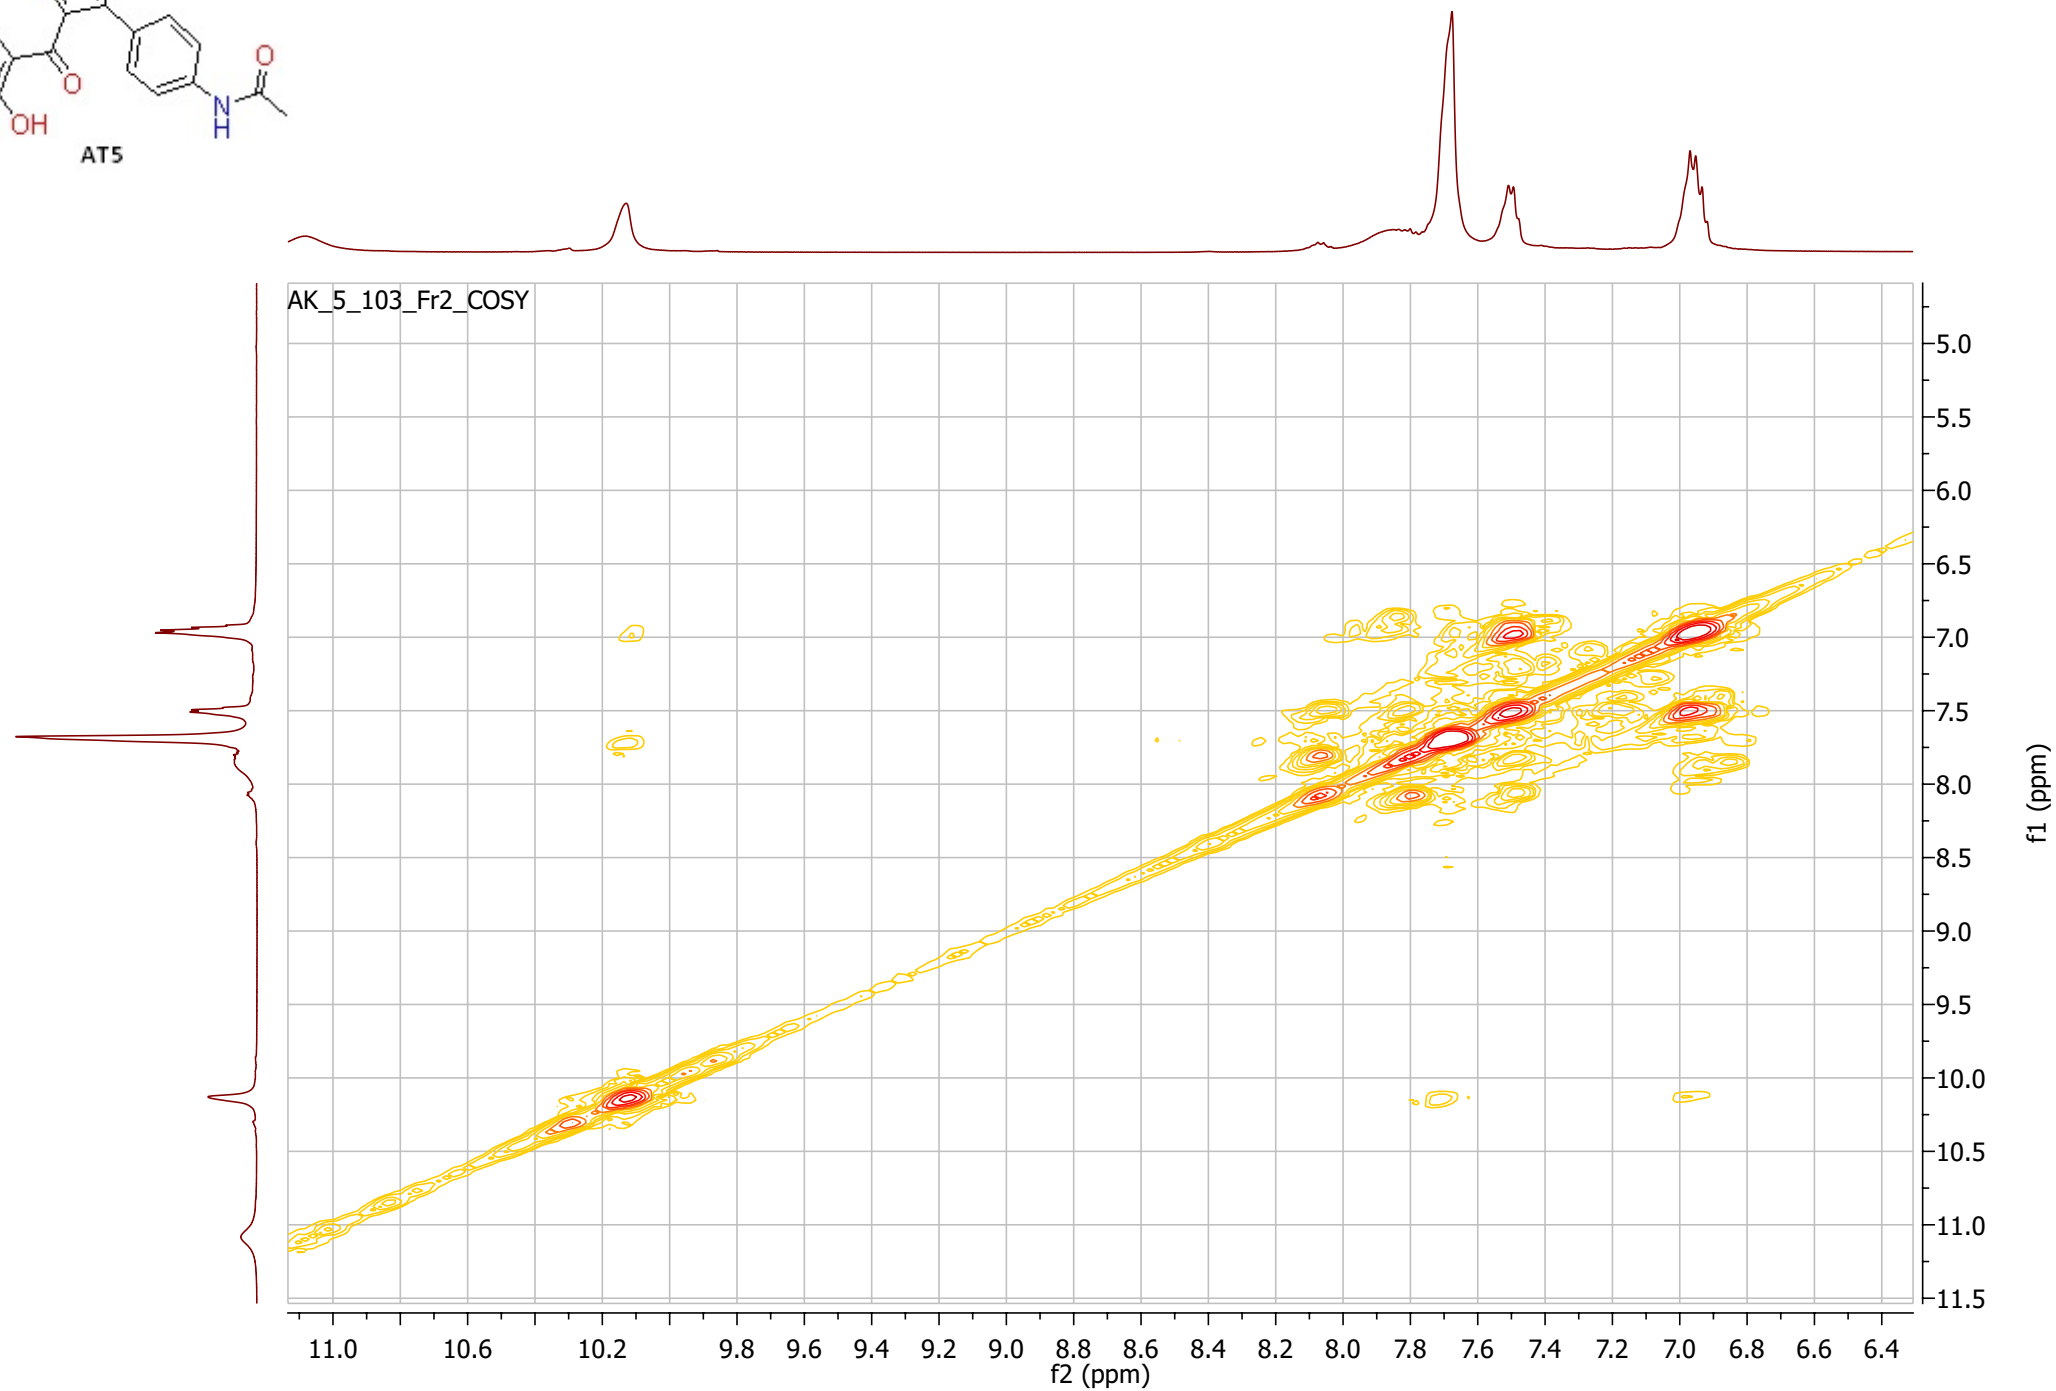

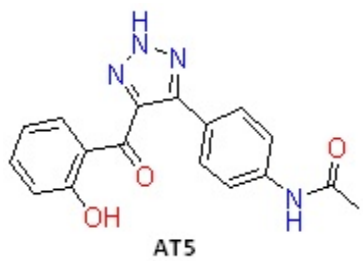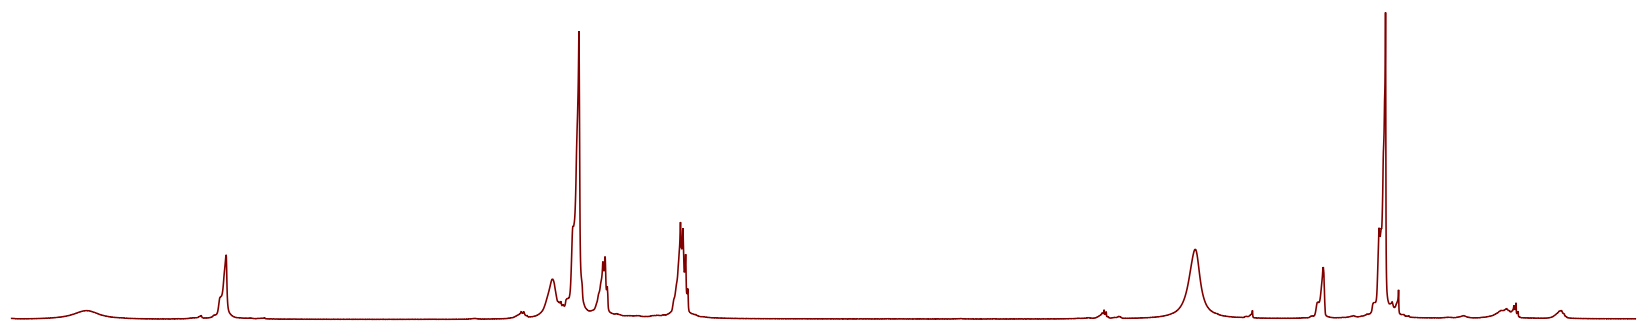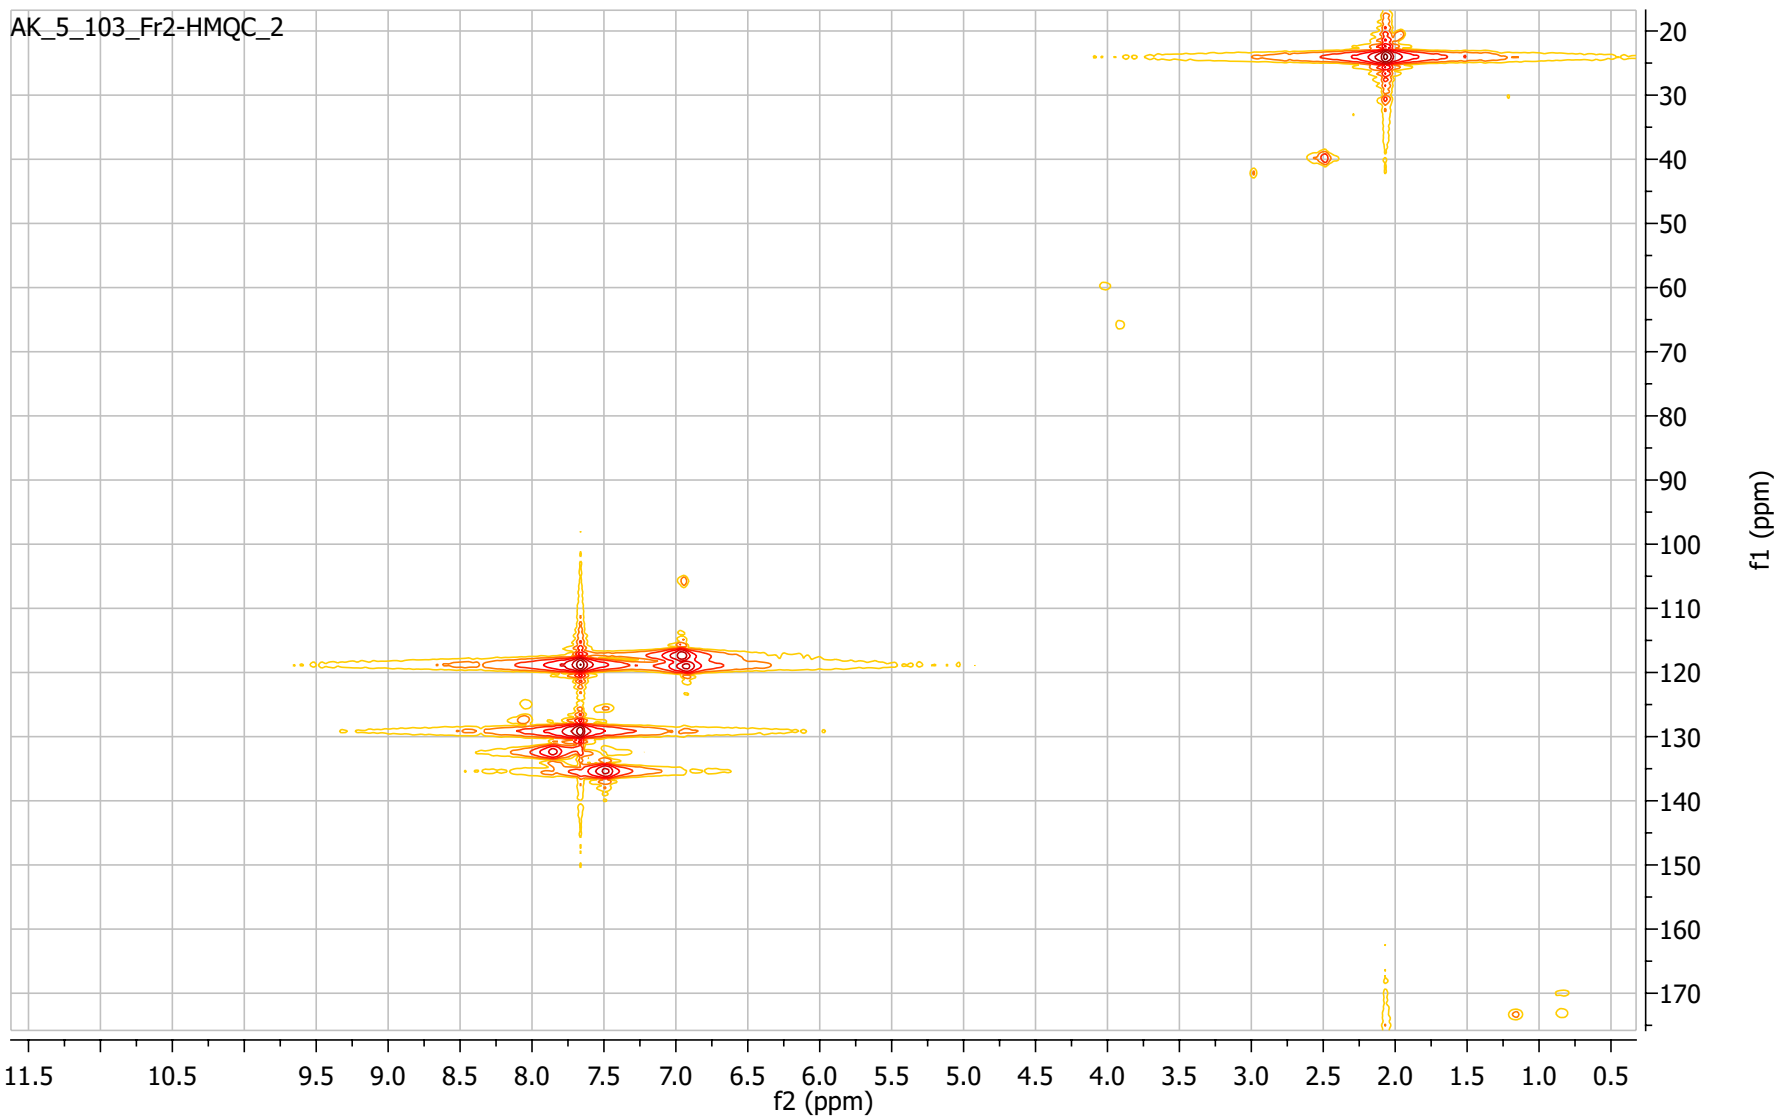

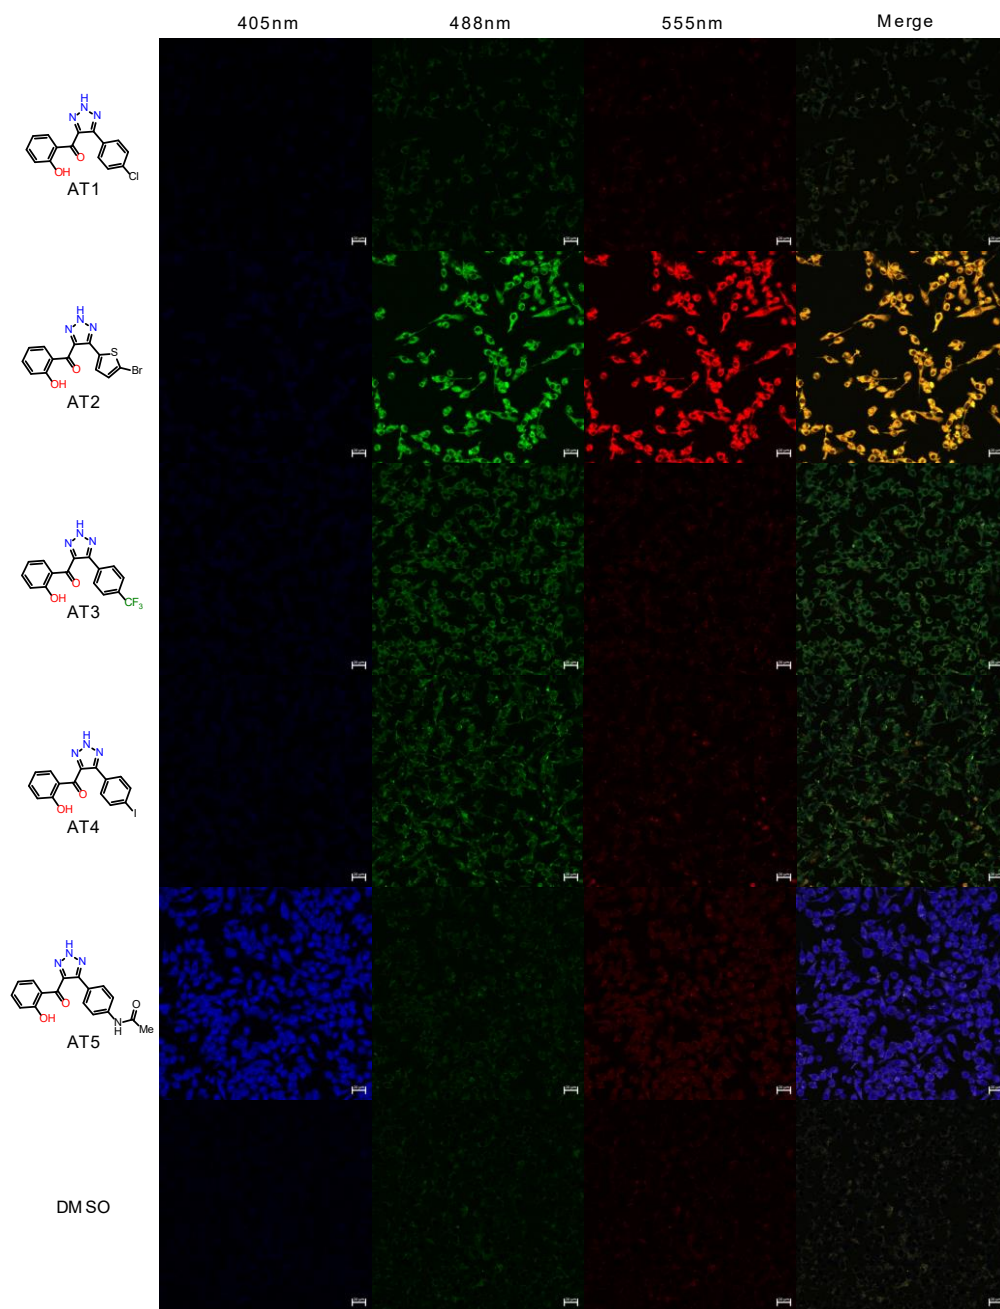

**Figure S2:** Full set of structures and images for figure 2. Brightness across all images was adjusted equally post analysis. Scale bars are 20µm.

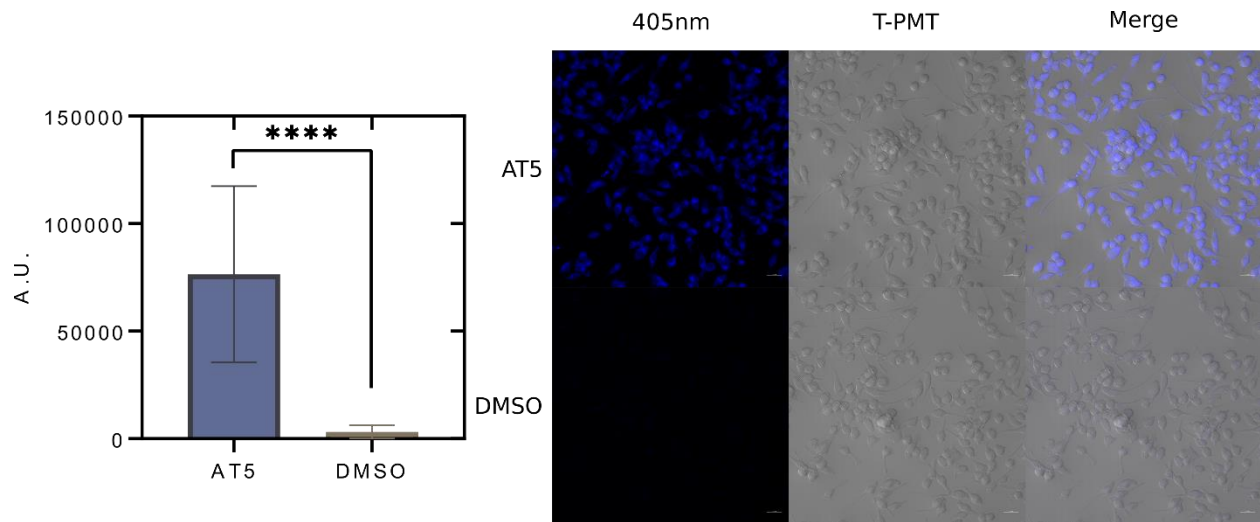

**Figure S3:** Fluorescent signal of **AT5** in fixed RAW 264.7 cells/unit area (pixel). Data is shown as the mean  $\pm$  SD,  $n=300$  cells across three, independent replicates. \*\*\*\* $p<0.0001$  using a two-tailed t-test with a Welch's correction. Values where the fluorescence intensity of the cell was less than the background (negative values) were set to zero. Brightness across all images was adjusted equally post analysis.

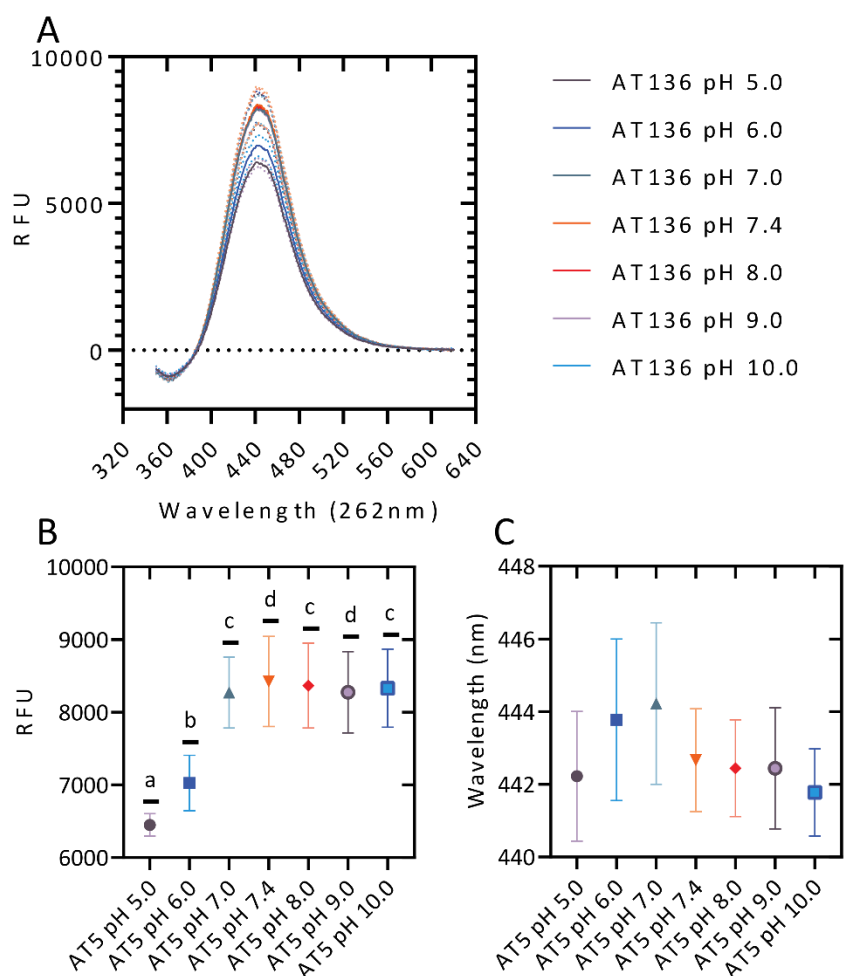

**Figure S4:** Effect of pH on emission of **AT5**. **A.** Emissions spectra of 100μM **AT5** in PBS at various pH. **B.** Peak emissions  $\pm$  SD of 100μM **AT5** in PBS at various pH. **C.** Peak emission wavelengths of 100μM **AT5** in PBS at various pH. Each value was measured using the CLARIOstar microplate reader in triplicate for three, independent replicates ( $n=9$ ). Statistical analysis was done using a Brown-Forsythe and Welch ANOVA; a-b,  $p<0.05$ ; a-c/d,  $p\leq 0.0001$ ; b-c,  $p< 0.0010$ ; b-d,  $p< 0.0014$ ; c-d,  $p> 0.9999$ .

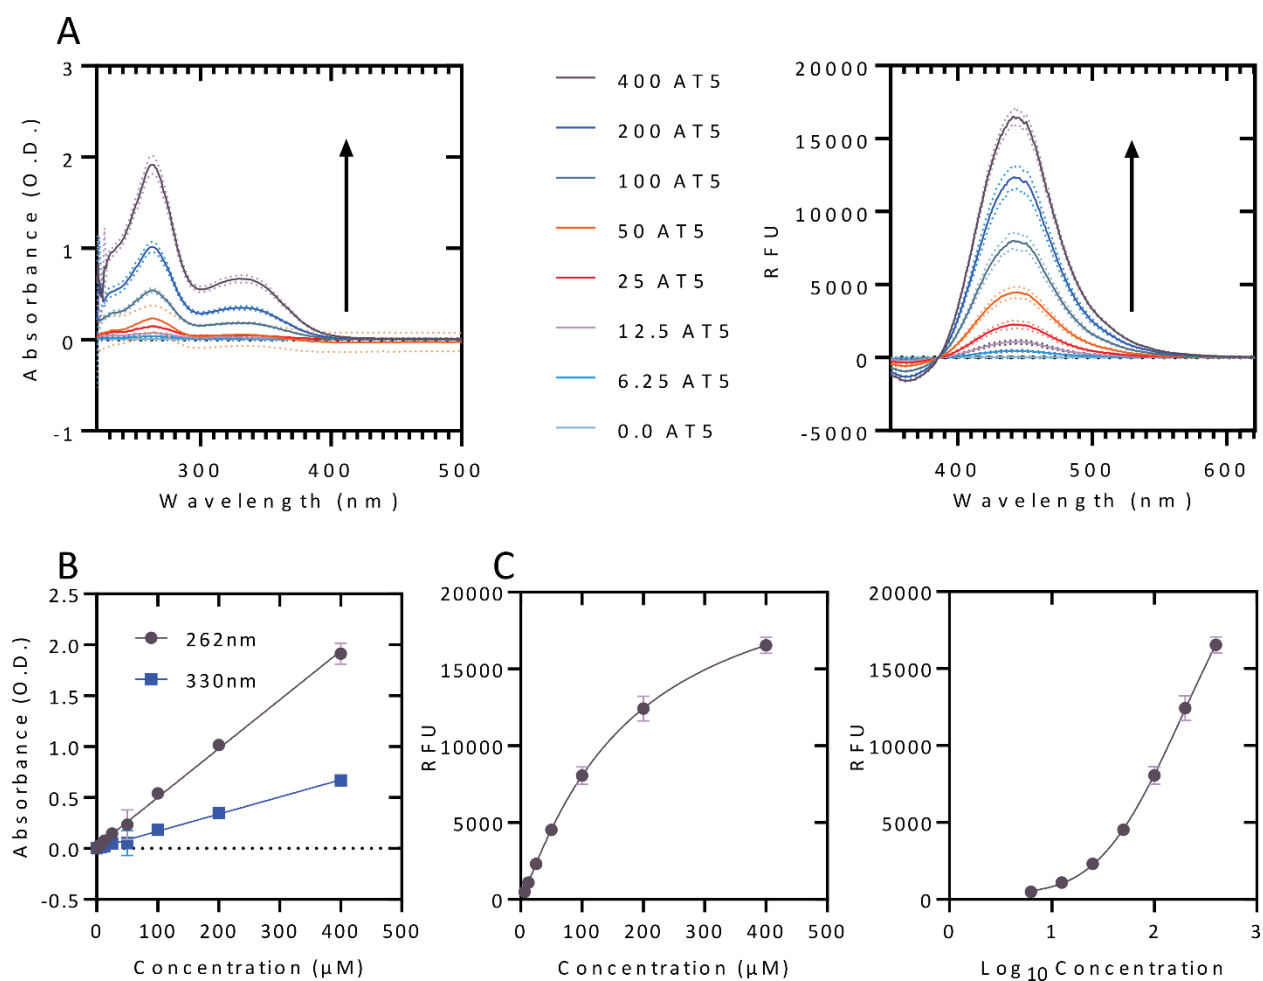

**Figure S5:** Absorbance and emission spectra for **AT5** at varying concentrations in PBS. **A.** Absorbance (left) and emissions (right) spectra of increasing concentrations (arrow) of **AT5** in  $\mu\text{M}$ . Absorbance at wavelengths above 500nm not shown. **B.** Absorbance at 262nm and 330nm for increasing concentrations of **AT5** including a linear regression analysis for each ( $r^2_{262\text{nm}} = 0.988$  and  $r^2_{330\text{nm}} = 0.958$ ). **C.** Peak emissions for increasing concentrations (left) and the  $\text{log}_{10}$  of each concentration (right) of **AT5**. Peak emissions for 0.0 $\mu\text{M}$  could not be determined due to lack of signal. Each value was measured using the CLARIOstar microplate reader in triplicate for three, independent replicates ( $n=9$ ).

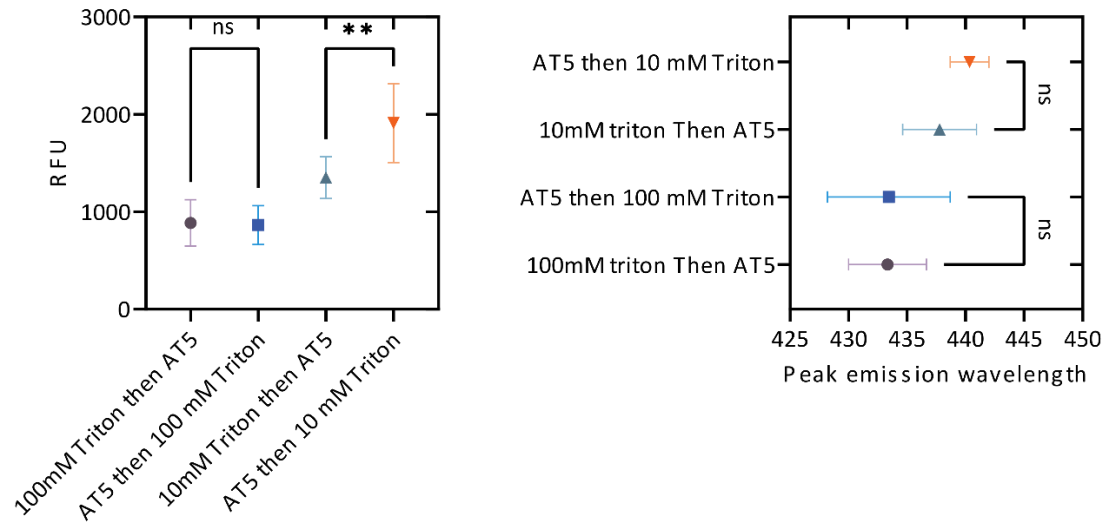

**Figure S6:** Order of mixing of **AT5** in Triton X-100. **AT5** was added to PBS either 30min before or 30min after the addition of Triton X-100. The solutions were then mixed and pipetted in triplicate into UV 96-well plates. Peak fluorescent intensity and peak emission wavelength for each is represented as the mean  $\pm$  SD. Statistical analysis performed is a Brown-Forsythe and Welch ANOVA,  $n=9$  wells across three, independent replicates. \*\* $p<0.01$ .
